# Supplementary material for: Strategies found not to be suitable for stabilizing high steroid hydroxylation activities of CYP450 BM3-based whole-cell biocatalysts
Source: PubMed Central journal article supplement (PMC11379211; doi:10.1371/journal.pone.0309965), 2024-09-06
Supplement: pone.0309965.s001.pdf [file pone.0309965.s001.pdf]

**S1 Table.** Primer sequences and PCR templates used for the construction of the plasmids used in this study.

| Plasmid                        | Primers               | Sequence (5'→3') <sup>2</sup>                                                                                    | PCR template <sup>1</sup>                                                                                                                      | Additional information <sup>3</sup>                                                                           |
|--------------------------------|-----------------------|------------------------------------------------------------------------------------------------------------------|------------------------------------------------------------------------------------------------------------------------------------------------|---------------------------------------------------------------------------------------------------------------|
| palk-ksa14m                    | PCK0017_for           | ATTTAATAAAAAATTGGAGAATTCATATGG<br>CAATTAAGAAATGCCTC                                                              | <i>ksa14m</i> gene<br>synthesis product                                                                                                        | insertion of <i>ksa14m</i><br>PCR product into<br>pCOM10 (cut with<br>NdeI and HindIII)                       |
|                                | PCK0018_rev           | ATCTTCTCTCATCCGCCAAAACAGAAGCTT<br>CGATCGTTACCCAGCCACACGTC                                                        |                                                                                                                                                |                                                                                                               |
| palk-<br>ksa14m-alkL           | PCK0019_for           | AAAGACGTGTGGGCTGGGTAACGATCGTA<br><b>ACTTTAAGAAGGAGATATACCT</b> ACTAGAT<br>GAGTTTTTCTAATTATAAAGTAATCG             | pCW3A4LS<br>(derived from<br>pLAFR3-AlkL<br>(Cornelissen <i>et al.</i> ,<br>2013))                                                             | insertion of <i>alkL</i> PCR<br>product into palk-<br>ksa14m (cut with<br>PvuI)                               |
|                                | PCK0020_rev           | CATCCGCCAAAACAGAAGCTTCGATCGTTA<br>GAAAACATATGACGCACC                                                             |                                                                                                                                                |                                                                                                               |
| plac-ksa14m                    | PCK0013_for           | TAGGAACCAGTACTGGAGAATTCATATG<br>GCAATTAAGAAATGCCTC                                                               | <i>ksa14m</i> gene<br>synthesis product                                                                                                        | insertion of <i>ksa14m</i><br>PCR product into<br>pCOM10_1A1_lac<br>(cut with NdeI and<br>HindIII)            |
|                                | PCK0014_rev           | ATCTTCTCTCATCCGCCAAAACAGAAGCTT<br>ACTAGTTTACCCAGCCACACGTC                                                        |                                                                                                                                                |                                                                                                               |
| plac-<br>ksa14m-alkL           | PCK0015_for           | GCAAAAGACGTGTGGGCTGGGTAAC <b>ACTAG</b><br><b>TTAACTTTAAGAAGGAGATATACCT</b> ACTA<br>GATGAGTTTTTCTAATTATAAAGTAATCG | pCW3A4LS<br>(derived from<br>pLAFR3-AlkL<br>(Cornelissen <i>et al.</i> ,<br>2013))                                                             | insertion of <i>alkL</i> PCR<br>product into plac-<br>ksa14m (cut with<br>BcuI)                               |
|                                | PCK0016_rev           | TTCATCCGCCAAAACAGAAGCTT <b>ACTAGT</b><br>TTAGAAAACATATGACGCACC                                                   |                                                                                                                                                |                                                                                                               |
| ptac-<br>ksa14m                | PCK0021_for           | TGACCAACAGTACTGGAGAATTCATATG<br>GCAATTAAGAAATGCCTC                                                               | <i>ksa14m</i> gene<br>synthesis product                                                                                                        | insertion of <i>ksa14m</i><br>PCR product into<br>pCOM10_tac (cut<br>with NdeI and<br>HindIII)                |
|                                | PCK0018_rev           | ATCTTCTCTCATCCGCCAAAACAGAAGCTT<br>CGATCGTTACCCAGCCACACGTC                                                        |                                                                                                                                                |                                                                                                               |
| ptac-<br>ksa14m-alkL           | PCK0019_for           | AAAGACGTGTGGGCTGGGTAACGATCGTA<br><b>ACTTTAAGAAGGAGATATACCT</b> ACTAGAT<br>GAGTTTTTCTAATTATAAAGTAATCG             | pCW3A4LS<br>(derived from<br>pLAFR3-AlkL<br>(Cornelissen <i>et al.</i> ,<br>2013))                                                             | insertion of <i>alkL</i> PCR<br>product into ptac-<br>ksa14m (cut with<br>PvuI)                               |
|                                | PCK0020_rev           | CATCCGCCAAAACAGAAGCTTCGATCGTTA<br>GAAAACATATGACGCACC                                                             |                                                                                                                                                |                                                                                                               |
| plac-<br>ksa14m-<br>fhuAΔ1-160 | PCK0082_for           | GCAAAAGACGTGTGGGCTGGGTAAC <b>ACTAG</b><br><b>TTAACTTTAAGAAGGAGATATACCT</b> ACTA<br>GATGGCGCTTCCAAAAC             | pETM11_KSA14m_f<br>huAΔ1-160<br>(Bertelmann <i>et al.</i> ,<br>2022)                                                                           | insertion of <i>fhuAΔ1-160</i><br>PCR product into<br>plac-ksa14m-alkL<br>(cut with BcuI)                     |
|                                | PCK0083_rev           | TTCATCCGCCAAAACAGAAGCTT <b>ACTAGT</b><br>TTAGAAAACGGAAGGTTGC                                                     |                                                                                                                                                |                                                                                                               |
| plac-<br>ksa14m-<br>todX       | PCK0084_for           | GCAAAAGACGTGTGGGCTGGGTAAC <b>ACTAG</b><br><b>TTAACTTTAAGAAGGAGATATACCT</b> ACTA<br>GATGAAGATTGCCAGCGTG           | pETM11_KSA14m_t<br>odX (Bertelmann <i>et</i><br><i>al.</i> , 2022)                                                                             | insertion of <i>todX</i><br>PCR product into<br>plac-ksa14m-alkL<br>(cut with BcuI)                           |
|                                | PCK0085_rev           | TTCATCCGCCAAAACAGAAGCTT <b>ACTAGT</b><br>TTAAAAATTTTTGCTATAGGAAACC                                               |                                                                                                                                                |                                                                                                               |
| pET154                         | PCK0075_for           | ATTGTGAGCGGATAACAATTCCTCTAGA<br>AATAATTTGTT <b>TAAC</b>                                                          | <i>cyp154c5</i> gene<br>synthesis product                                                                                                      | insertion of <i>cyp154c5</i><br>PCR product into<br>pETM11 (cut with<br>XbaI and NotI)                        |
|                                | PCK0076_rev           | GGTGGTGGTGGTGGTGGTCTCGAGTGC                                                                                      |                                                                                                                                                |                                                                                                               |
| pET154-<br>camAB               | PCK0027_for<br>(camA) | TGGGGCGCTAAGAGCTCCGTCGACA <b>AAGCT</b><br><b>TTAACTTTAAGAAGGAGATATACCAT</b> GAA<br>CGCAAACGACAACGTGGTC           | genomic DNA of<br><i>Pseudomonas</i><br><i>putida</i> DSM50198<br>(DSMZ – German<br>Collection of<br>Microorganisms and<br>Cell Cultures GmbH) | simultaneous<br>insertion of <i>camA</i><br>and <i>camB</i> PCR<br>products into pET154<br>(cut with HindIII) |
|                                | PCK0028_rev<br>(camA) | CTCCTTCTTAAAGTTACTCTAGTAG <b>GATCC</b><br>CTCTAGTATTAGGCACTACTCAGTTCAGCT<br>TTG                                  |                                                                                                                                                |                                                                                                               |
|                                | PCK0029_for<br>(camB) | CTACTAGAGTA <b>ACTTTAAGAAGGAGATAT</b><br><b>ACC</b> ATGTCTAAAGTAGTGTATGTGTAC                                     |                                                                                                                                                |                                                                                                               |
|                                | PCK34_rev<br>(camB)   | GGTGTCTCGAGTGC <b>GGCCGCAAGCTAAGCT</b><br>ITTACCATTGCCTATCGGGAAC                                                 |                                                                                                                                                |                                                                                                               |
| pET154-<br>camAB-alkL          | PCK0035_for           | AGGCAATGGTAAAAGCTTAGCTT <b>GCGGCC</b><br><b>GCTAACTTTAAGAAGGAGATATACCAT</b> GAA<br>GTTTTTCTAATTATAAAGTAATCG      | pCW3A4LS<br>(derived from<br>pLAFR3-AlkL<br>(Cornelissen <i>et al.</i> ,<br>2013))                                                             | insertion of <i>alkL</i> PCR<br>product into pET154-<br>camAB (cut with<br>NotI)                              |
|                                | PCK0036_rev           | GGTGGTGGTGGTGGTGGTCTCGAGT <b>GCGGC</b><br><b>CGCTTAGAAAACATATGACGCACC</b>                                        |                                                                                                                                                |                                                                                                               |

|                 |                                |                                                                                                                                                                                                                                |                                                                                                                                                |                                                                                          |
|-----------------|--------------------------------|--------------------------------------------------------------------------------------------------------------------------------------------------------------------------------------------------------------------------------|------------------------------------------------------------------------------------------------------------------------------------------------|------------------------------------------------------------------------------------------|
| pET154A         | PCK0078_for<br><br>PCK0079_rev | AGAGCTCCGTCGACAAGCTTTAAGCGGCC<br><u>GCTAACTTTAAGAAGGAGATATACCATGA</u><br>GTTTTCTAATTATAAAGTAATC<br><br>GGTGGTGGTGGTGGTGGTCTCGAGTGCGGC<br><u>CGCTTAGAAAACATATGACGCACC</u>                                                       | pCW3A4LS<br>(derived from<br>pLAFR3-AlkL<br>(Cornelissen <i>et al.</i> ,<br>2013))                                                             | insertion of <i>alkL</i> PCR<br>product into pET154                                      |
| pET106          | PCK0075_for<br><br>PCK0077_rev | ATTGTGAGCGGATAACAATCCCCTCTAGA<br>AATAATTTTGT <b>TAAAC</b><br><br>GGTGGTGGTGGTGGTGGTCTCGAGTGCGGC<br><u>CGCTTAAAGCTTGTCGACGGAG</u>                                                                                               | <i>cyp106a2</i> gene<br>synthesis product                                                                                                      | insertion of <i>cyp106a2</i><br>PCR product into<br>pETM11                               |
| pET106A         | PCK0078_for<br><br>PCK0079_rev | AGAGCTCCGTCGACAAGCTTTAAGCGGCC<br><u>GCTAACTTTAAGAAGGAGATATACCATGA</u><br>GTTTTCTAATTATAAAGTAATC<br><br>GGTGGTGGTGGTGGTGGTCTCGAGTGCGGC<br><u>CGCTTAGAAAACATATGACGCACC</u>                                                       | pCW3A4LS<br>(derived from<br>pLAFR3-AlkL<br>(Cornelissen <i>et al.</i> ,<br>2013))                                                             | insertion of <i>alkL</i> PCR<br>product into pET106                                      |
| ptac154         | PCK0063_for<br><br>PCK0064_rev | AGTCCGTTTAGGTGTTTTACGAGCAATTG<br>CCTCTAGAAATAATTTTGT <b>TAAAC</b><br><br>TGGCTGCAGGTGCACGGATCCC <b>GGGCGC</b><br><u>GCCTTAAAGCTTGTCGACGG</u>                                                                                   | <i>cyp154c5</i> gene<br>synthesis product                                                                                                      | insertion of <i>cyp154c5</i><br>PCR product in<br>pCOM10_tac (cut<br>with MnlI and SgsI) |
| ptac154A        | PCK0065_for<br><br>PCK0066_rev | AGAGCTCCGTCGACAAGCTTTAAGCGCGC<br><u>CCTAACTTTAAGAAGGAGATATACCATGA</u><br>GTTTTCTAATTATAAAGTAATC<br><br>ACAGAAGCTTGGCTGCAGGTGCACGGATC<br><u>CTTAGAAAACATATGACGCACC</u>                                                          | pCW3A4LS<br>(derived from<br>pLAFR3-AlkL<br>(Cornelissen <i>et al.</i> ,<br>2013))                                                             | insertion of <i>alkL</i> PCR<br>product in ptac154<br>(cut with SgsI and<br>BamHI)       |
| ptac106         | PCK0067_for<br><br>PCK0068_rev | AGTCCGTTTAGGTGTTTTACGAGCAATTG<br>CCTCTAGAAATAATTTTGT <b>TAACTTTAAG</b><br><b>AAGGAGATATACCATGA</b> AGGAGGTGATCG<br>CAG<br><br>TGGCTGCAGGTGCACGGATCCC <b>GGGCGC</b><br><u>GCCTTAAAGCTTGTCGACGGAGCTTTACA</u><br>TACGACTCGCTTTCAG | <i>cyp106a2</i> gene<br>synthesis product                                                                                                      | insertion of <i>cyp106a2</i><br>PCR product in<br>pCOM10_tac (cut<br>with MnlI and SgsI) |
| ptac106A        | PCK0065_for<br><br>PCK0066_rev | AGAGCTCCGTCGACAAGCTTTAAGCGCGC<br><u>CCTAACTTTAAGAAGGAGATATACCATGA</u><br>GTTTTCTAATTATAAAGTAATC<br><br>ACAGAAGCTTGGCTGCAGGTGCACGGATC<br><u>CTTAGAAAACATATGACGCACC</u>                                                          | pCW3A4LS<br>(derived from<br>pLAFR3-AlkL<br>(Cornelissen <i>et al.</i> ,<br>2013))                                                             | insertion of <i>alkL</i> PCR<br>product in ptac106<br>(cut with SgsI and<br>BamHI)       |
| pACYC-<br>camA  | PCK0059_for<br><br>PCK0060_rev | GTTAACTTTAAT <b>AAGGAG</b> ATATACCATG<br>AACGCAAACGACAACGTGGTC<br><br>TGTCGACCTGCAGGCGCGCCGAGCTCTCA<br>GGCACTACTCAGTTCAGCTTTG                                                                                                  | genomic DNA of<br><i>Pseudomonas</i><br><i>putida</i> DSM50198<br>(DSMZ – German<br>Collection of<br>Microorganisms and<br>Cell Cultures GmbH) | insertion of <i>camA</i><br>PCR product into<br>pACYC_DuetI (cut<br>with NcoI and SacI)  |
| pACYC-<br>camAB | PCK0061_for<br><br>PCK0062_rev | GTTAAGTATAAG <b>AAGGAG</b> ATATACATATGT<br>CTAAAGTAGTGTATGTGTACAC<br><br>GCGATCGCGTGGCCGCGCATATCCAATT<br><u>GTTACCATTGCCTATCGGGAAAC</u>                                                                                        | genomic DNA of<br><i>Pseudomonas</i><br><i>putida</i> DSM50198<br>(DSMZ – German<br>Collection of<br>Microorganisms and<br>Cell Cultures GmbH) | insertion of <i>camB</i><br>PCR product into<br>pACYC-camA (cut<br>with NdeI and MnlI)   |

<sup>1</sup> Genes encoding the respective CYP450s, redox partner proteins, or outer membrane proteins were amplified from various sources using suitable primers.

<sup>2</sup> Primers contained (parts of) ribosomal binding sites (**bold**), restriction sites, and 25 bp overhangs complementary to the plasmid backbone.

<sup>3</sup> The resulting PCR products were inserted into the different vectors by *in vitro assembly* (Gibson *et al.*, 2009). Final plasmid constructs were then introduced into the desired host organism.

## References

Bertelmann, C., Mock, M., Koch, R., Schmid, A., and Bühler, B. (2022) Hydrophobic outer membrane pores boost testosterone hydroxylation by cytochrome P450 monooxygenase BM3 containing cells. *Front Catal* **2**: 887458.

Cornelissen, S., Julsing, M.K., Volmer, J., Riechert, O., Schmid, A., and Bühler, B. (2013) Whole-cell-based CYP153A6-catalyzed (S)-limonene hydroxylation efficiency depends on host background and profits from monoterpene uptake via AlkL. *Biotechnol Bioeng* **110**: 1282-1292.

Gibson, D.G., Young, L., Chuang, R.-Y., Venter, J.C., Hutchison, C.A., 3rd, and Smith, H.O. (2009) Enzymatic assembly of DNA molecules up to several hundred kilobases. *Nat Methods* **6**: 343-345.
