# Supplementary material for: Strategies found not to be suitable for stabilizing high steroid hydroxylation activities of CYP450 BM3-based whole-cell biocatalysts
Source: PubMed Central journal article supplement (PMC11379211; doi:10.1371/journal.pone.0309965), 2024-09-06
Supplement: pone.0309965.s002.pdf [file pone.0309965.s002.pdf]

**S2 Table.** Components and settings of site-directed mutagenesis PCR to introduce M82A and L188P amino acid exchanges into KSA14m.

| Composition of PCR mixture         |                     | Temperature profile  |                       |                    |
|------------------------------------|---------------------|----------------------|-----------------------|--------------------|
| PCR component                      | Final concentration | Step                 | M82A                  | L188P              |
| 5X Q5 Reaction Buffer              | 1X                  | Initial denaturation | 98°C, 90 sec          | 98°C, 90 sec       |
| 10 mM dNTPS                        | 200 µM              | Denaturation         | 98°C, 30 sec          | 98°C, 30 sec       |
| 10 µM Forward primer               | 0.5 µM              | Annealing            | 59°C, 30 sec          | 68°C, 30 sec       |
| 10 µM Reverse primer               | 0.5 µM              | Elongation           | 72°C, 4 min<br>35 sec | 72°C, 4 min 36 sec |
| Template DNA<br>pETM11-ksa14m-alkL | 20 ng               | Final elongation     | 72°C, 10 min          | 72°C, 10 min       |
| Q5 High Fidelity Polymerase        | 1 U                 | Hold                 | 4°C                   | 4°C                |

| Plasmid                   | Primer    | Sequence (5'→3')          |
|---------------------------|-----------|---------------------------|
| pETM11-ksa14m(M82A)-alkL  | M82A_for  | TCGTGATTTTGCAGGAGACGGG    |
|                           | M82A_rev  | AGAAATTTAAGCGCTTGAC       |
| pETM11-ksa14m(L188P)-alkL | L188P_for | ATGAACAAGCCACAGCGAGCAAATC |
|                           | L188P_rev | GTTCAATTGCTTCATCCAGTGCAC  |
