# Supplementary material for: Strategies found not to be suitable for stabilizing high steroid hydroxylation activities of CYP450 BM3-based whole-cell biocatalysts
Source: PubMed Central journal article supplement (PMC11379211; doi:10.1371/journal.pone.0309965), 2024-09-06
Supplement: pone.0309965.s003.pdf [file pone.0309965.s003.pdf]

**S3 Table.** Composition and preparation of minimal media used in this study.

| <b>M9 medium</b><br>(Sambrook and Russell, 2001)                                                                                                                                     |                       | <b>M9<sup>+</sup> medium</b><br>(Panke <i>et al.</i> , 1999)                                                                                                                         |                        | <b>Riesenberg (RB) medium</b><br>(Riesenberg <i>et al.</i> , 1991)                                                                                                                                                                  |                        |
|--------------------------------------------------------------------------------------------------------------------------------------------------------------------------------------|-----------------------|--------------------------------------------------------------------------------------------------------------------------------------------------------------------------------------|------------------------|-------------------------------------------------------------------------------------------------------------------------------------------------------------------------------------------------------------------------------------|------------------------|
| <b>Component</b>                                                                                                                                                                     | <b>Concentration</b>  | <b>Component</b>                                                                                                                                                                     | <b>Concentration</b>   | <b>Component</b>                                                                                                                                                                                                                    | <b>Concentration</b>   |
| Na <sub>2</sub> HPO <sub>4</sub> · 2H <sub>2</sub> O                                                                                                                                 | 8.5 g L <sup>-1</sup> | Na <sub>2</sub> HPO <sub>4</sub> · 2H <sub>2</sub> O                                                                                                                                 | 25.5 g L <sup>-1</sup> | (NH <sub>4</sub> ) <sub>2</sub> HPO <sub>4</sub>                                                                                                                                                                                    | 13.3 g L <sup>-1</sup> |
| KH <sub>2</sub> PO <sub>4</sub>                                                                                                                                                      | 3.0 g L <sup>-1</sup> | KH <sub>2</sub> PO <sub>4</sub>                                                                                                                                                      | 9.0 g L <sup>-1</sup>  | KH <sub>2</sub> PO <sub>4</sub>                                                                                                                                                                                                     | 4.0 g L <sup>-1</sup>  |
| NaCl                                                                                                                                                                                 | 0.5 g L <sup>-1</sup> | NaCl                                                                                                                                                                                 | 0.5 g L <sup>-1</sup>  | Citric acid                                                                                                                                                                                                                         | 1.7 g L <sup>-1</sup>  |
| NH <sub>4</sub> Cl                                                                                                                                                                   | 1.0 g L <sup>-1</sup> | NH <sub>4</sub> Cl                                                                                                                                                                   | 1.0 g L <sup>-1</sup>  | -                                                                                                                                                                                                                                   | -                      |
| Main medium components were dissolved in MilliQ water and pH was adjusted to 7.2 using NaOH (10 M). After sterilization, the medium was supplemented with the following ingredients: |                       | Main medium components were dissolved in MilliQ water and pH was adjusted to 7.2 using NaOH (10 M). After sterilization, the medium was supplemented with the following ingredients: |                        | Main medium components were dissolved in MilliQ water and pH was adjusted to 6.8 using 25% ammonia and then further increased to 7.2 by 10 M NaOH. After sterilization, the medium was supplemented with the following ingredients: |                        |
| <b>Supplement</b>                                                                                                                                                                    | <b>Concentration</b>  | <b>Supplement</b>                                                                                                                                                                    | <b>Concentration</b>   | <b>Supplement</b>                                                                                                                                                                                                                   | <b>Concentration</b>   |
| MgSO <sub>4</sub>                                                                                                                                                                    | 2 mM                  | MgSO <sub>4</sub>                                                                                                                                                                    | 2 mM                   | MgSO <sub>4</sub>                                                                                                                                                                                                                   | 2.5 mM                 |
| US <sup>+</sup> trace elements<br>(Panke <i>et al.</i> , 1999)                                                                                                                       | 0.1% (v/v)            | US <sup>+</sup> trace elements<br>(Panke <i>et al.</i> , 1999)                                                                                                                       | 0.1% (v/v)             | US <sup>+</sup> trace elements<br>(Panke <i>et al.</i> , 1999)                                                                                                                                                                      | 0.1% (v/v)             |
| D-glucose                                                                                                                                                                            | 0.5% (w/v)            | D-glucose                                                                                                                                                                            | 0.5% (w/v)             | D-glucose                                                                                                                                                                                                                           | 0.5% (w/v)             |

## References

Panke, S., Meyer, A., Huber, C.M., Witholt, B., and Wubbolts, M.G. (1999) An alkane-responsive expression system for the production of fine chemicals. *Appl Environ Microbiol* **65**: 2324-2332.

Riesenberg, D., Schulz, V., Knorre, W.A., Pohl, H.-D., Korz, D., Sanders, E.A., *et al.* (1991) High cell density cultivation of *Escherichia coli* at controlled specific growth rate. *J Biotechnol* **20**: 17-27.

Sambrook, J., and Russell, D.W. (2001) *Molecular cloning: a laboratory manual*. Cold Spring Harbor, NY: Cold Spring Harbor Laboratory Press.
