# Supplementary material for: Strategies found not to be suitable for stabilizing high steroid hydroxylation activities of CYP450 BM3-based whole-cell biocatalysts
Source: PubMed Central journal article supplement (PMC11379211; doi:10.1371/journal.pone.0309965), 2024-09-06
Supplement: pone.0309965.s013.pdf [file pone.0309965.s013.pdf]

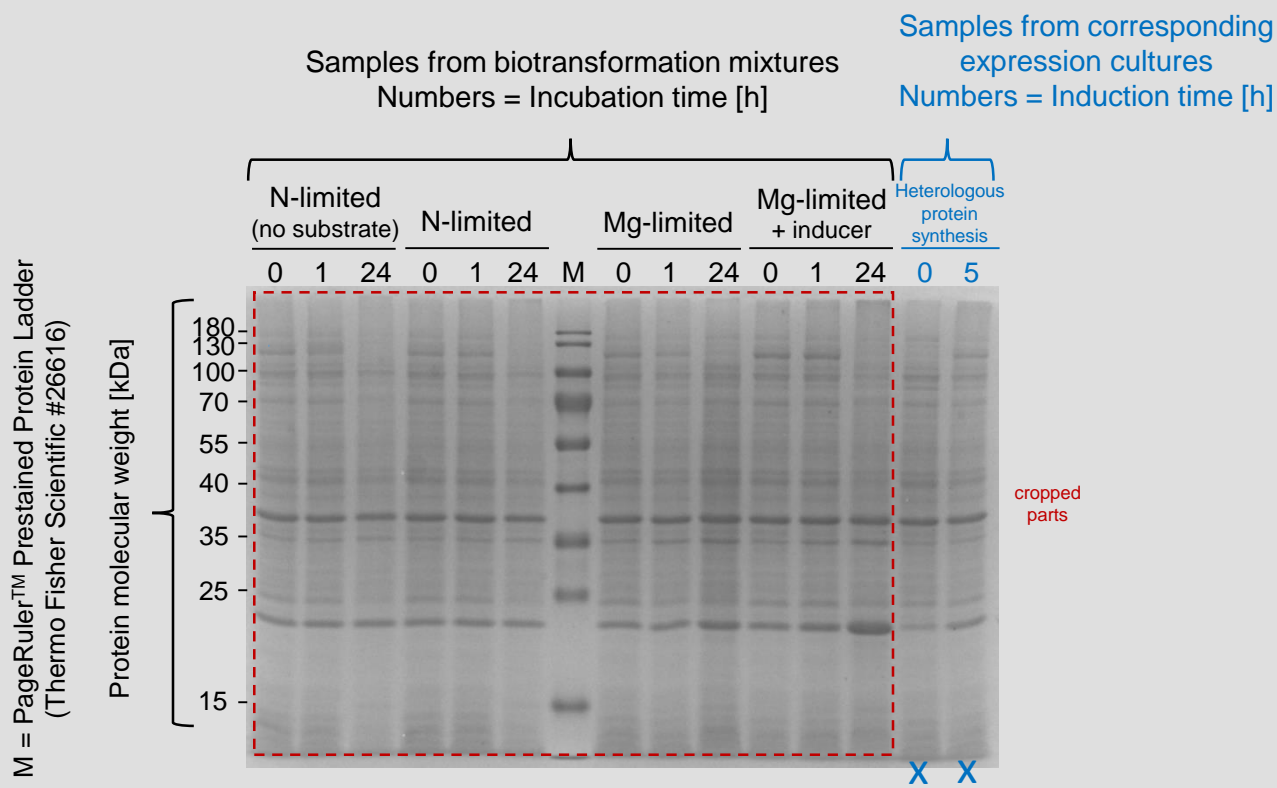

Fig 2B, left:

Samples from corresponding  
expression cultures  
Induction time [h]      Biotransformation time [h]  
0   5   M   0   0.5   1   1.5   2   3   4   5   24

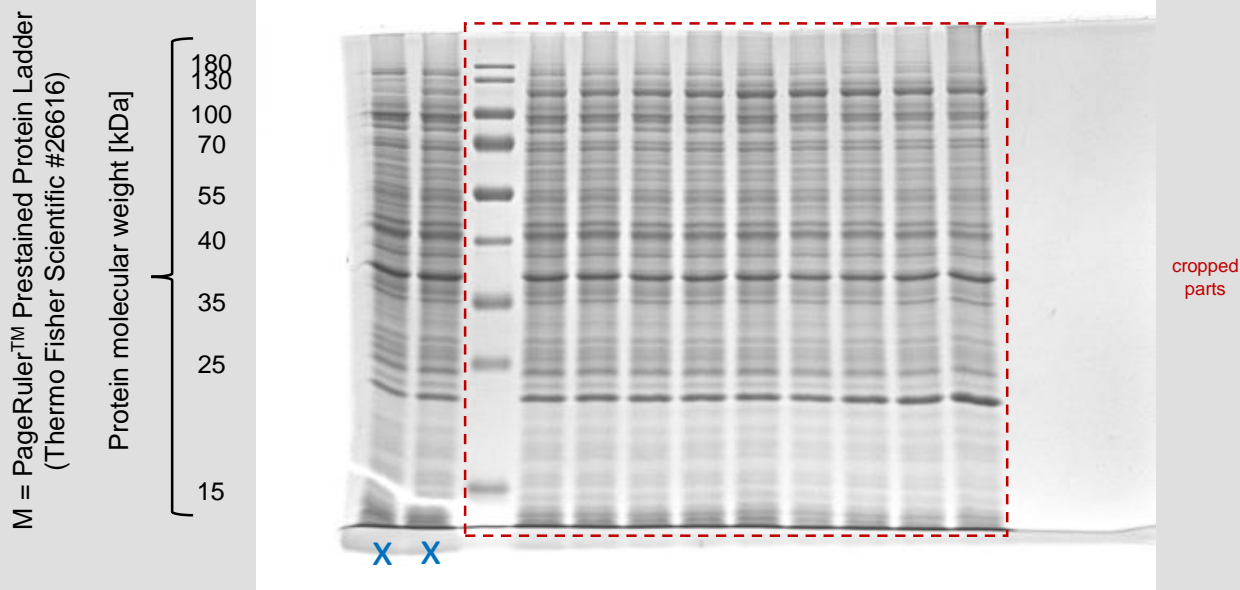

Fig 2B, right:

Biotransformation time [h]  
M   0   0.5   1   1.5   2   3   4   5   24

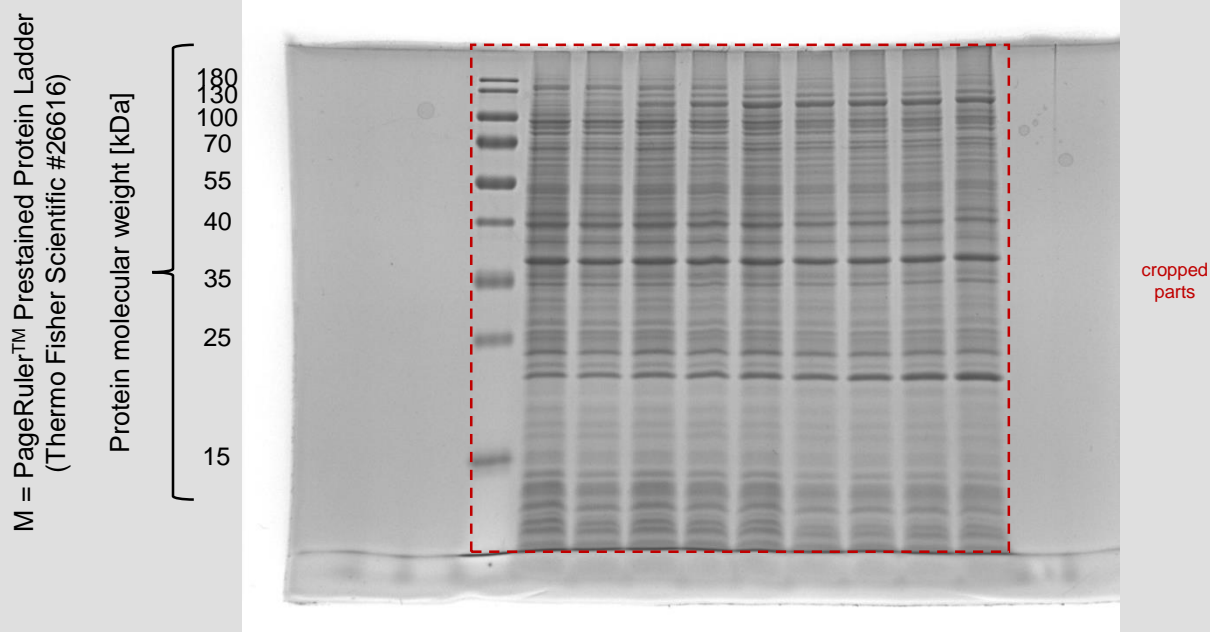

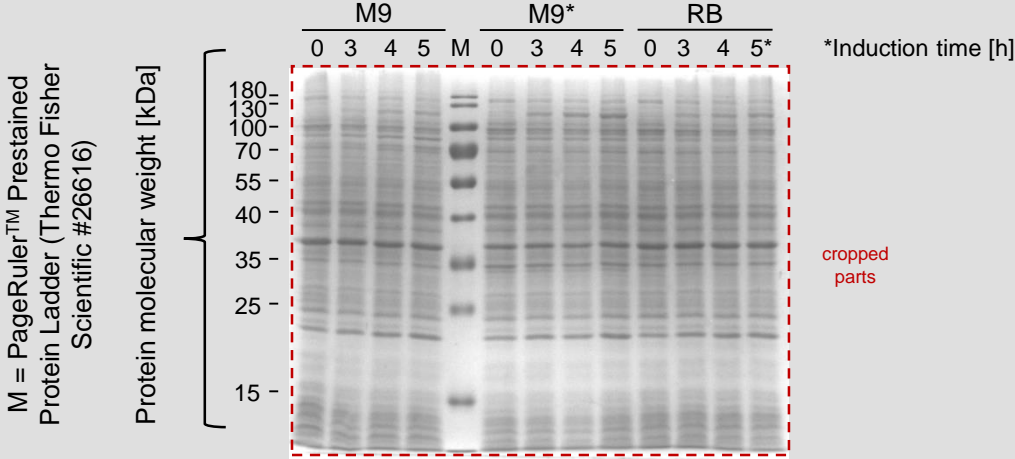

Raw image for main Fig 6B, captured by Quantum ST5 and VisionCapt Software Version 16.16.0.0 (Vilber Lourmat, Collégien, France).

M = PageRuler™ Prestained  
Protein Ladder (Thermo Fisher  
Scientific #26616)

Protein molecular weight [kDa]

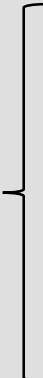

180  
130  
100

M 1 2 3 4 5 6

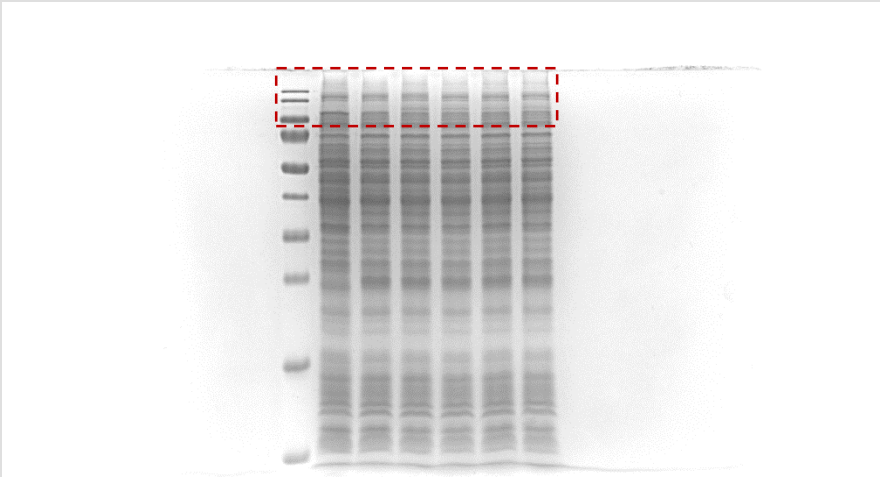

cropped  
parts

**palk-ksa14m-alkL**

Same sample  
as in  
„0.0025%  
DCPK, 0h“

0.0025% DCPK                      0.00625% DCPK  
0 1 2 3 4 5 M                      0 1 2 3 4 5\*

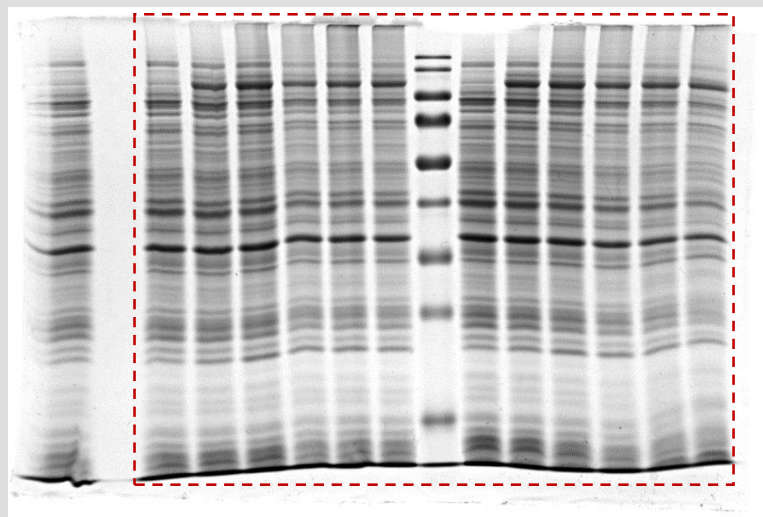

M = PageRuler™ Prestained  
Protein Ladder (Thermo Fisher  
Scientific #26616)  
Protein molecular weight [kDa]  
-180  
-130  
-100  
-70  
-55  
-40  
-35  
-25  
-15

cropped  
parts

\*Induction time [h]

**palk-ksa14m-alkL**

0.0125% DCPK                      0.025% DCPK  
0 1 2 3 4 5 M                      0 1 2 3 4 5\*

M = PageRuler™ Prestained  
Protein Ladder (Thermo Fisher  
Scientific #26616)

Protein molecular weight [kDa]  
180  
130  
100  
70  
55  
40  
35  
25  
15

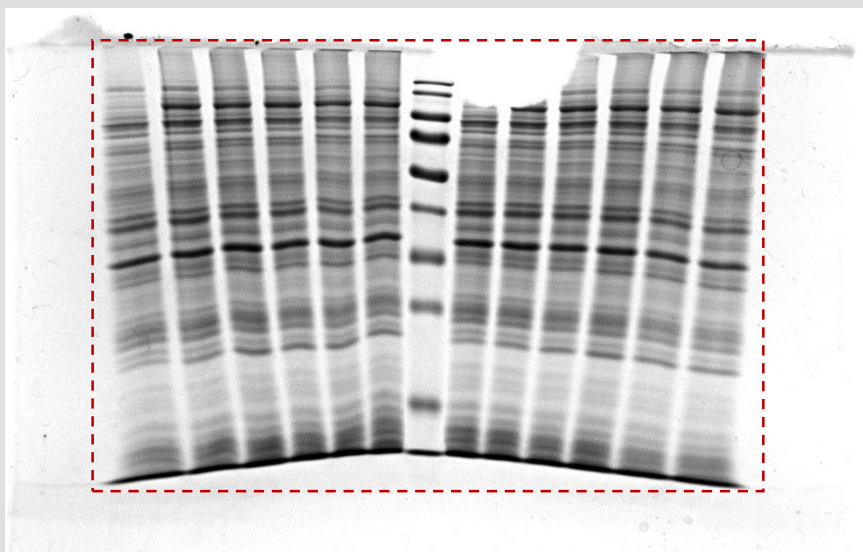

cropped  
parts

Raw image for S3B Fig, captured by Quantum ST5 and VisionCapt Software Version 16.16.0.0 (Vilber Lourmat, Collégien, France).

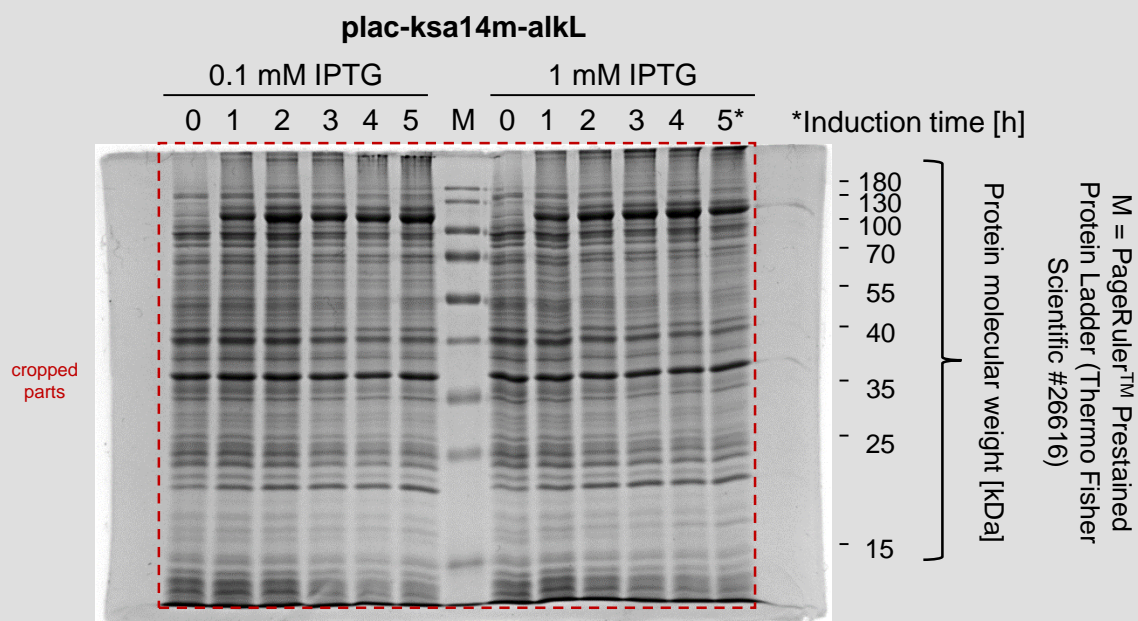

Raw image for S3C Fig, captured by Quantum ST5 and VisionCapt Software Version 16.16.0.0 (Vilber Lourmat, Collégien, France).

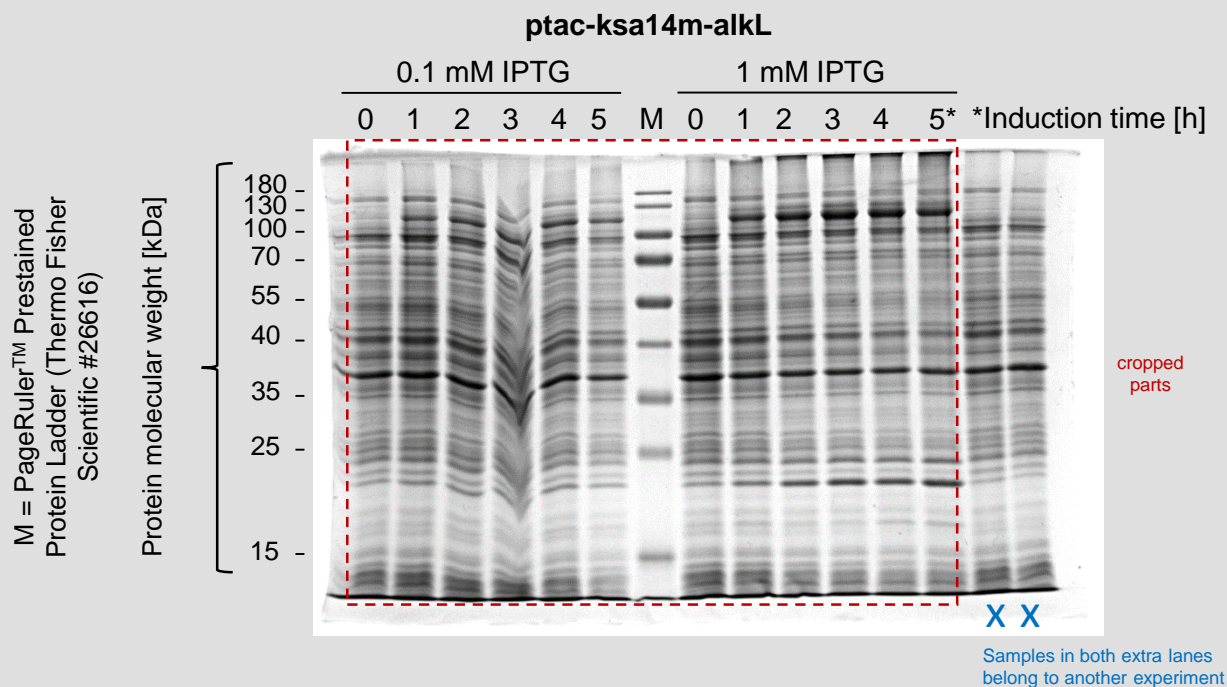

**pETM11-ksa14m-alkL**

0 0.1 0.5 1 IPTG concentration [mM]  
M 0 5 0 5 0 5 0 5\* \*Induction time [h]

M = PageRuler™ Prestained  
Protein Ladder (Thermo Fisher  
Scientific #26616)

Protein molecular weight [kDa]

180-  
130-  
100-  
70-  
55-  
40-  
35-  
25-  
15-

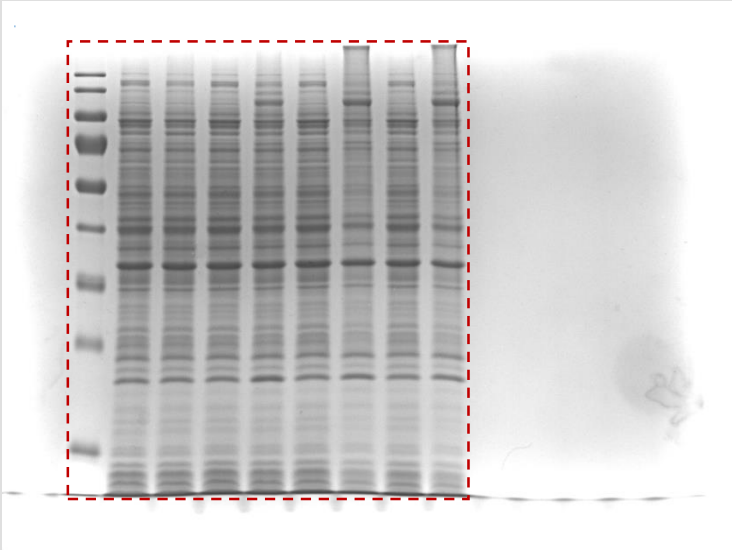

cropped  
parts

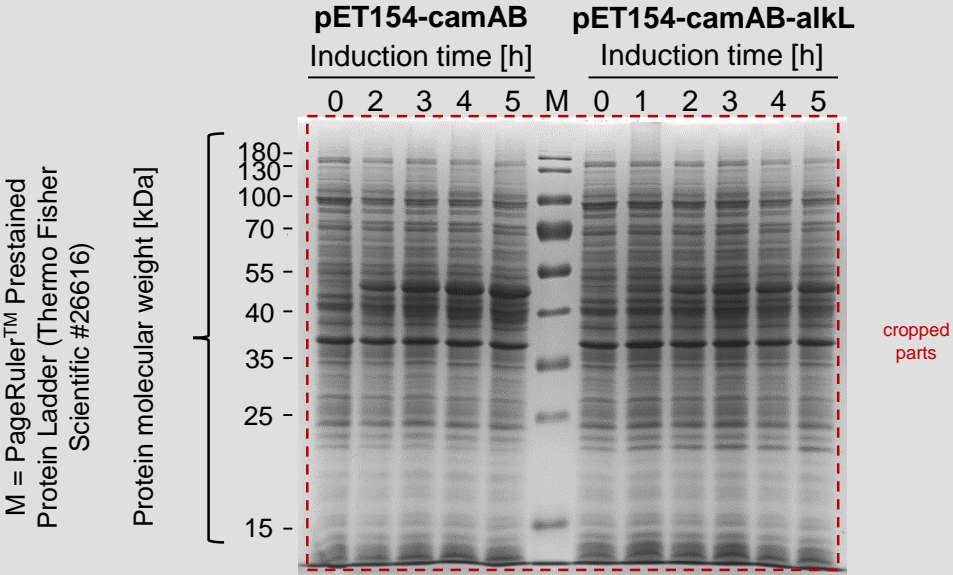



Raw image for S9A Fig, captured by Quantum ST5 and VisionCapt Software Version 16.16.0.0 (Vilber Lourmat, Collégien, France).

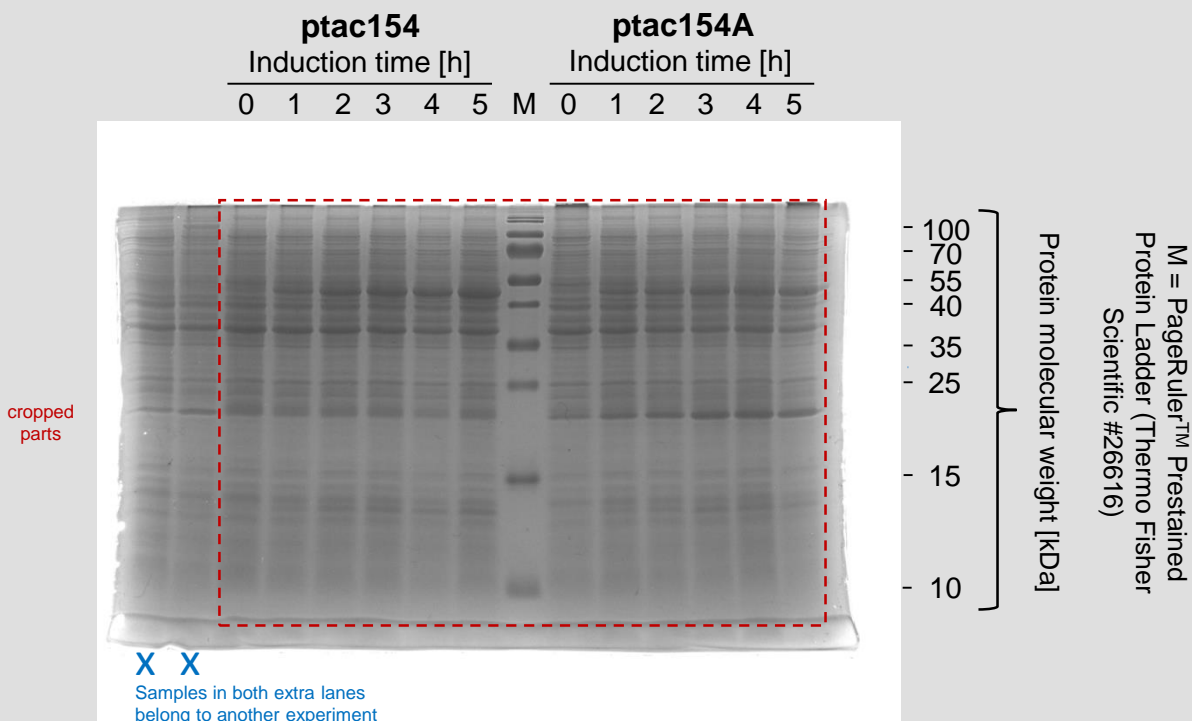

Raw image for S9B Fig, captured by Quantum ST5 and VisionCapt Software Version 16.16.0.0 (Vilber Lourmat, Collégien, France).

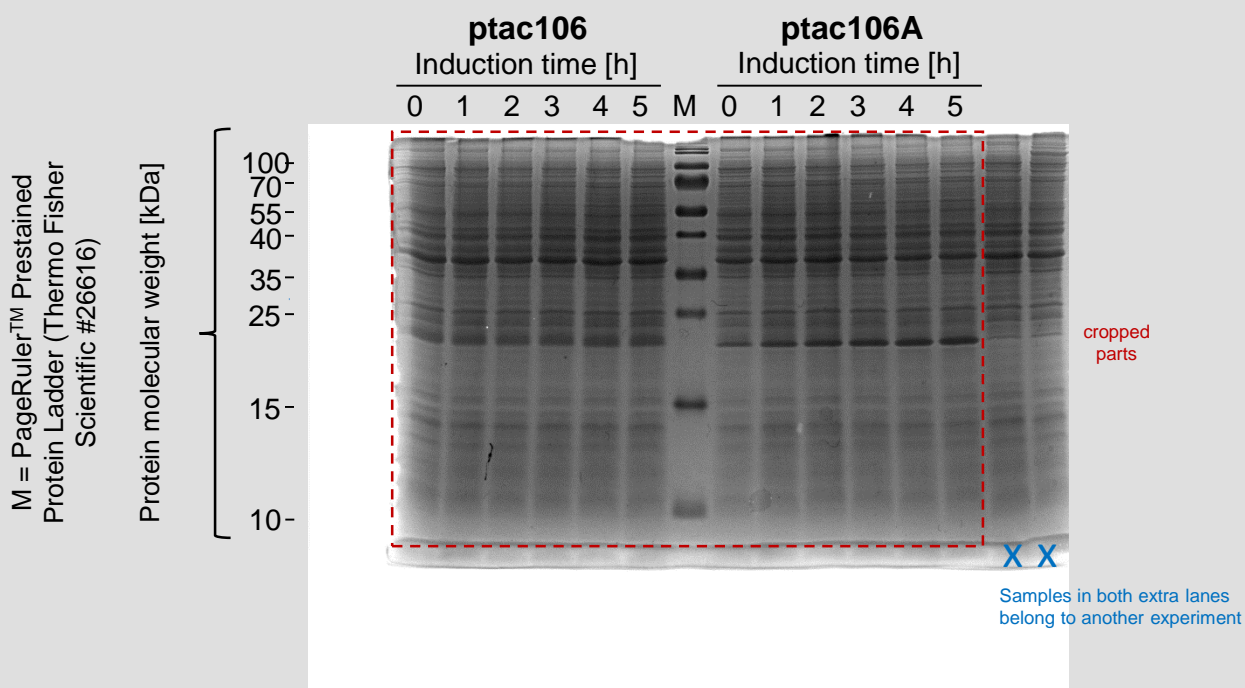

Raw image for S9C Fig, captured by Quantum ST5 and VisionCapt Software Version 16.16.0.0 (Vilber Lourmat, Collégien, France).

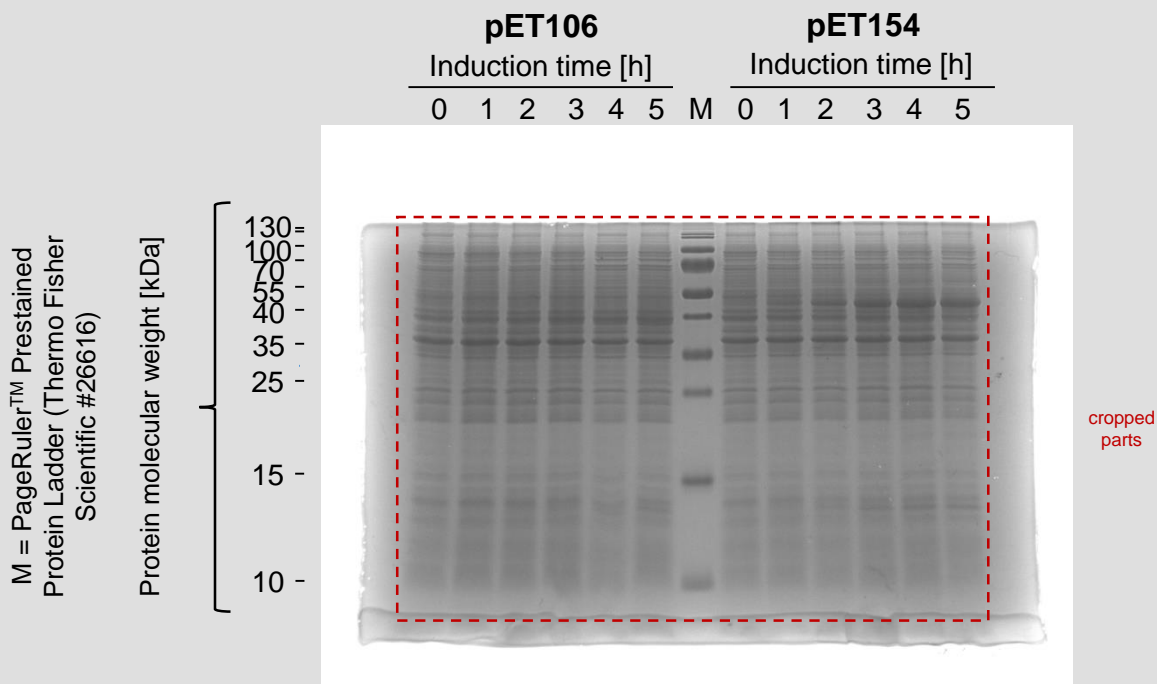

Raw image for S9D Fig, captured by Quantum ST5 and VisionCapt Software Version 16.16.0.0 (Vilber Lourmat, Collégien, France).

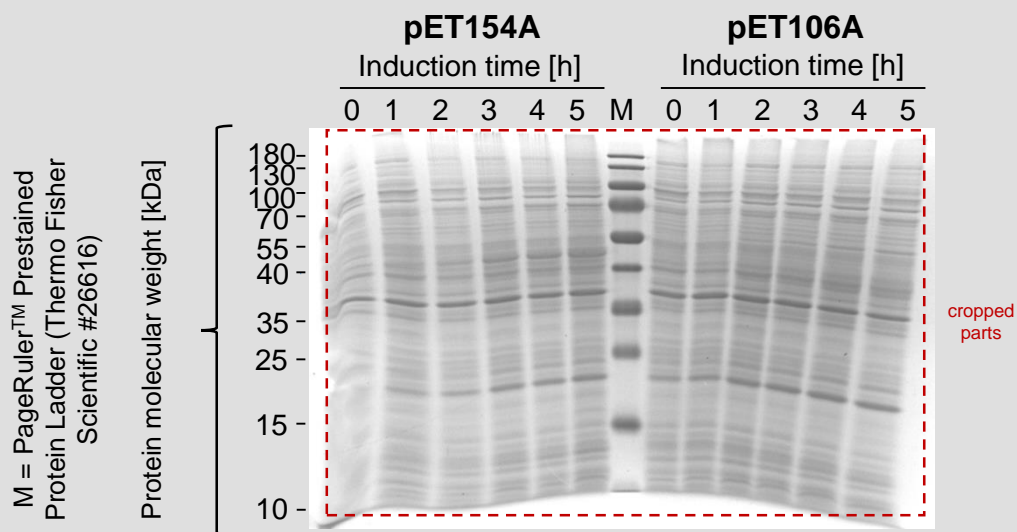

**pACYC-camAB**

Induction time [h]

0 1 2 3 4 5 M

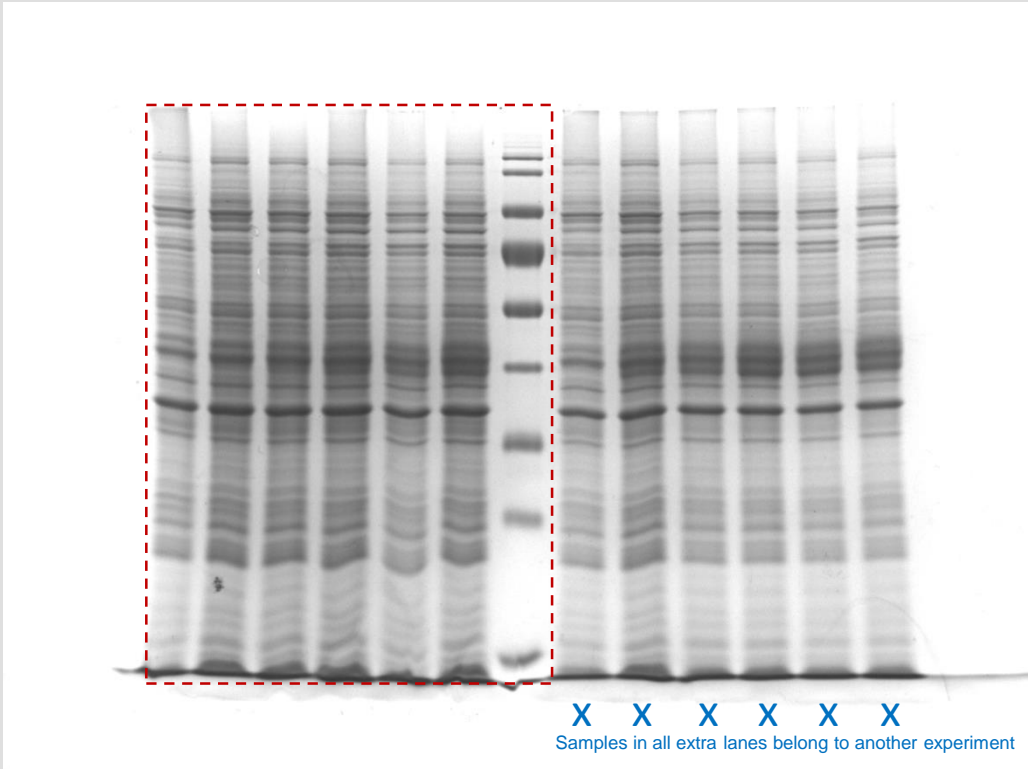

180  
130  
100  
70  
55  
40  
35  
25  
15

Protein molecular weight [kDa]  
M = PageRuler™ Prestained Protein Ladder (Thermo Fisher Scientific #26616)

cropped parts
